# Supplementary material for: Fast synthesis of fluorescent SiO2@CdTe nanoparticles with reusability in detection of H2O2
Source: Royal Society of Chemistry journal article supplement (doi:10.1039/c5tb00740b), 2015-01-01
Supplement: c5tb00740b1.pdf [file c5tb00740b1.pdf]

## Electronic Supplementary Information

### Fast synthesis of fluorescent SiO<sub>2</sub>@CdTe nanoparticles with reusability in detection of H<sub>2</sub>O<sub>2</sub>

Jiejie Ge<sup>a,b</sup>, Xiangling Ren<sup>b, \*</sup>, Xiaozhong Qiu<sup>a, \*</sup>, Haitang Shi<sup>b</sup>, Xianwei Meng<sup>b, \*</sup>,  
and Fangqiong Tang<sup>b</sup>

<sup>a</sup> Department of Anatomy, Guangdong Provincial Key Laboratory of Construction and Detection in Tissue Engineering, Southern Medical University, Guangzhou 510515, China.

<sup>b</sup> Laboratory of Controllable Preparation and Application of Nanomaterials, Center for Micro/nanomaterials and Technology, Technical Institute of Physics and Chemistry, Chinese Academy of Sciences, Beijing 100190, China.

\*Corresponding author. Tel: 86-10-82543521; Fax: 86-10-62554670

Tel: +86-20- 61647752; Fax: +86-20- 61648199

E-mail: mengxw@mail.ipc.ac.cn;

qqiuxzh@163.com;

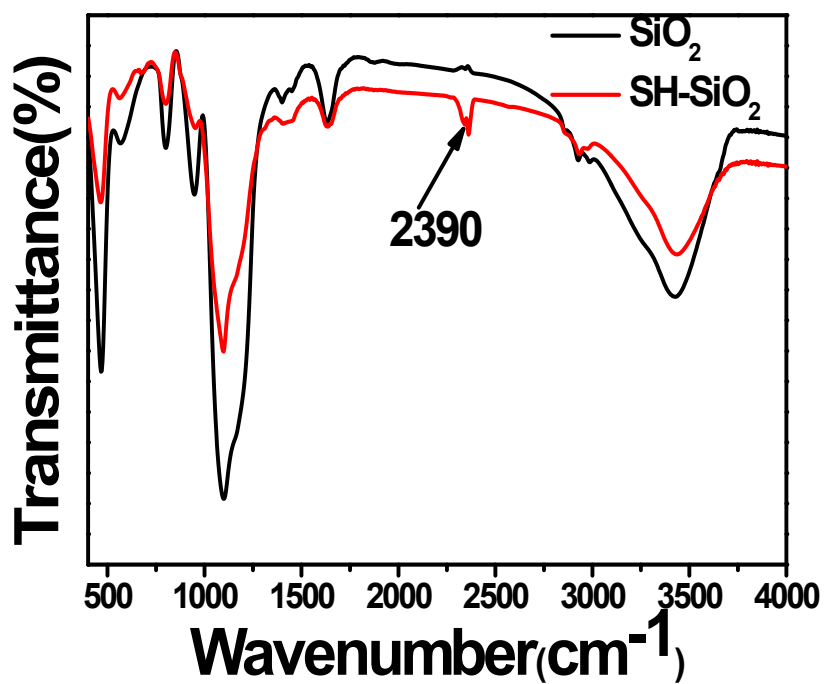

Fig. S1 FT-IR spectra of SiO<sub>2</sub> and SH-SiO<sub>2</sub>.

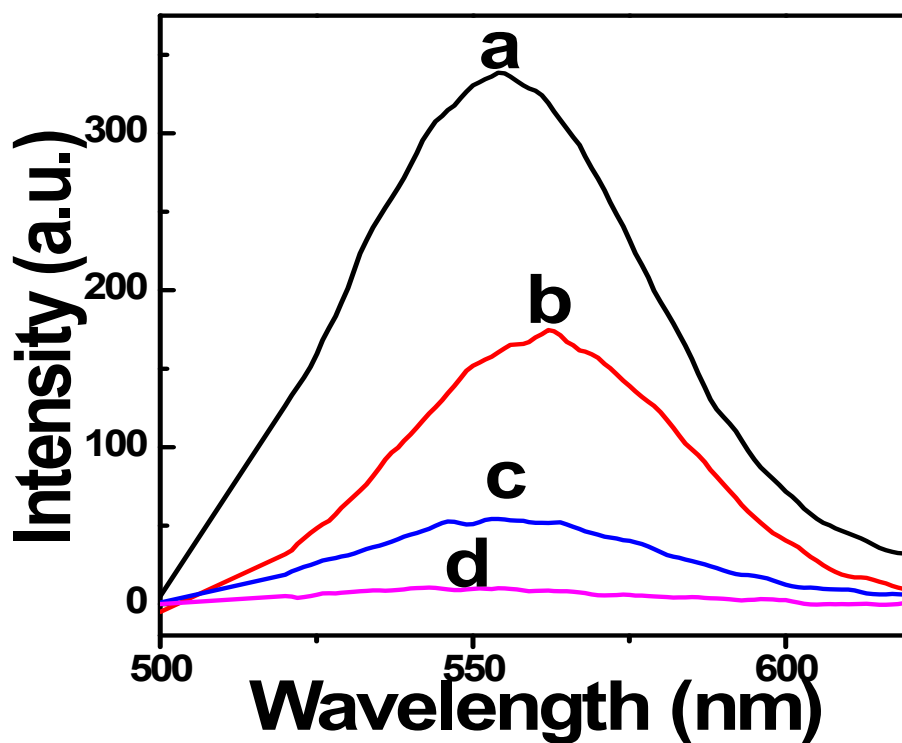

Fig. S2 (a) The fluorescent spectrum of the pure SiO<sub>2</sub>@CdTe NPs and (b-d) the fluorescent spectra of the first, second, third washing supernatant.

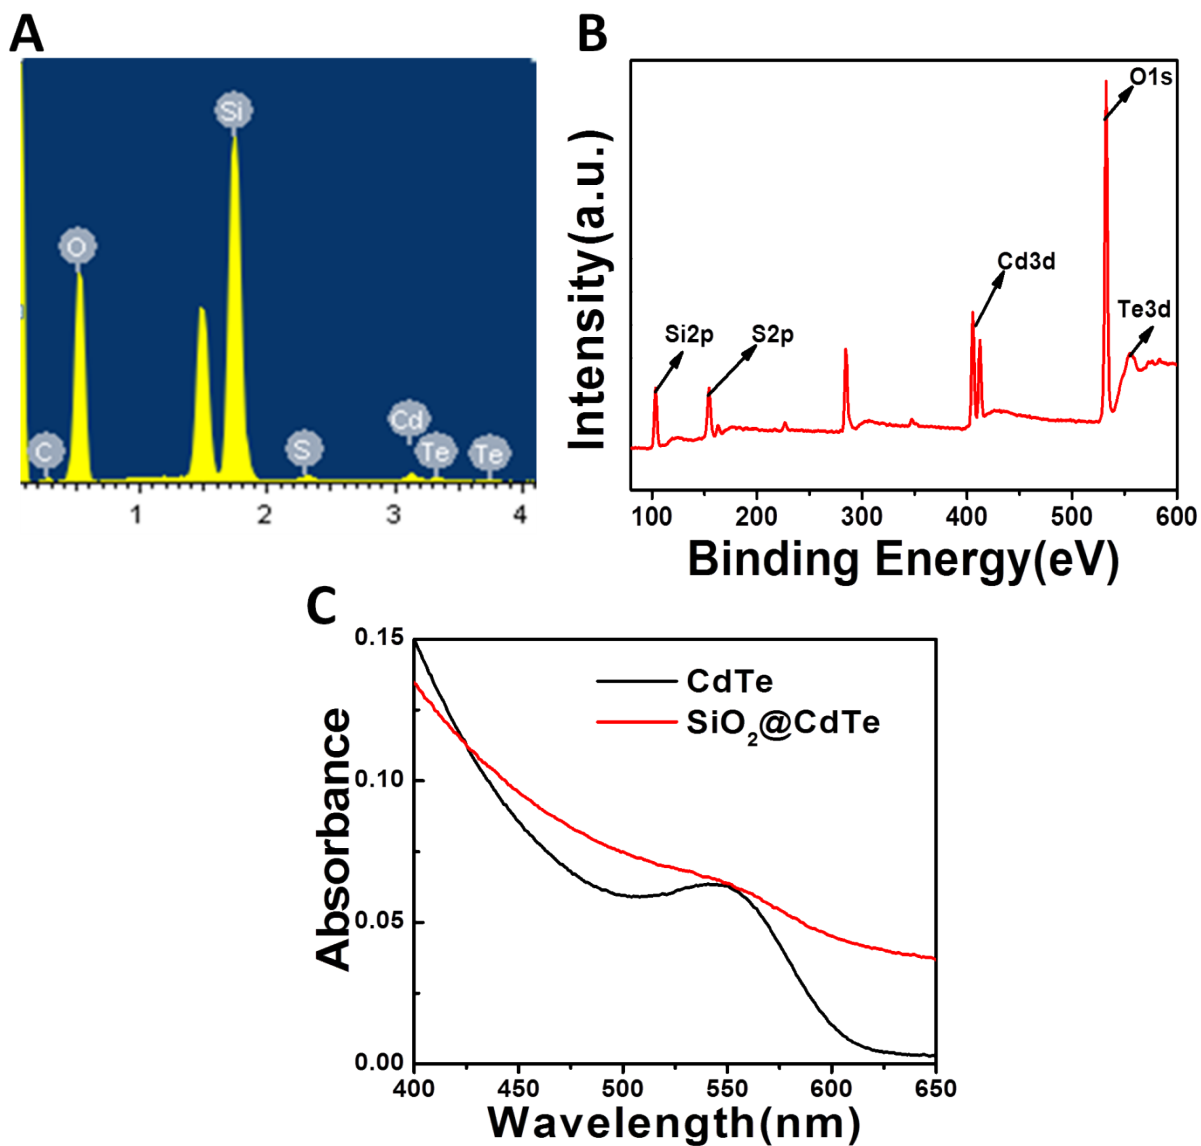

**Fig. S3** (A) EDS and (B) XPS of the as-prepared SiO<sub>2</sub>@CdTe NPs; (C) Absorption spectrum of CdTe QDs and SiO<sub>2</sub>@CdTe NPs.

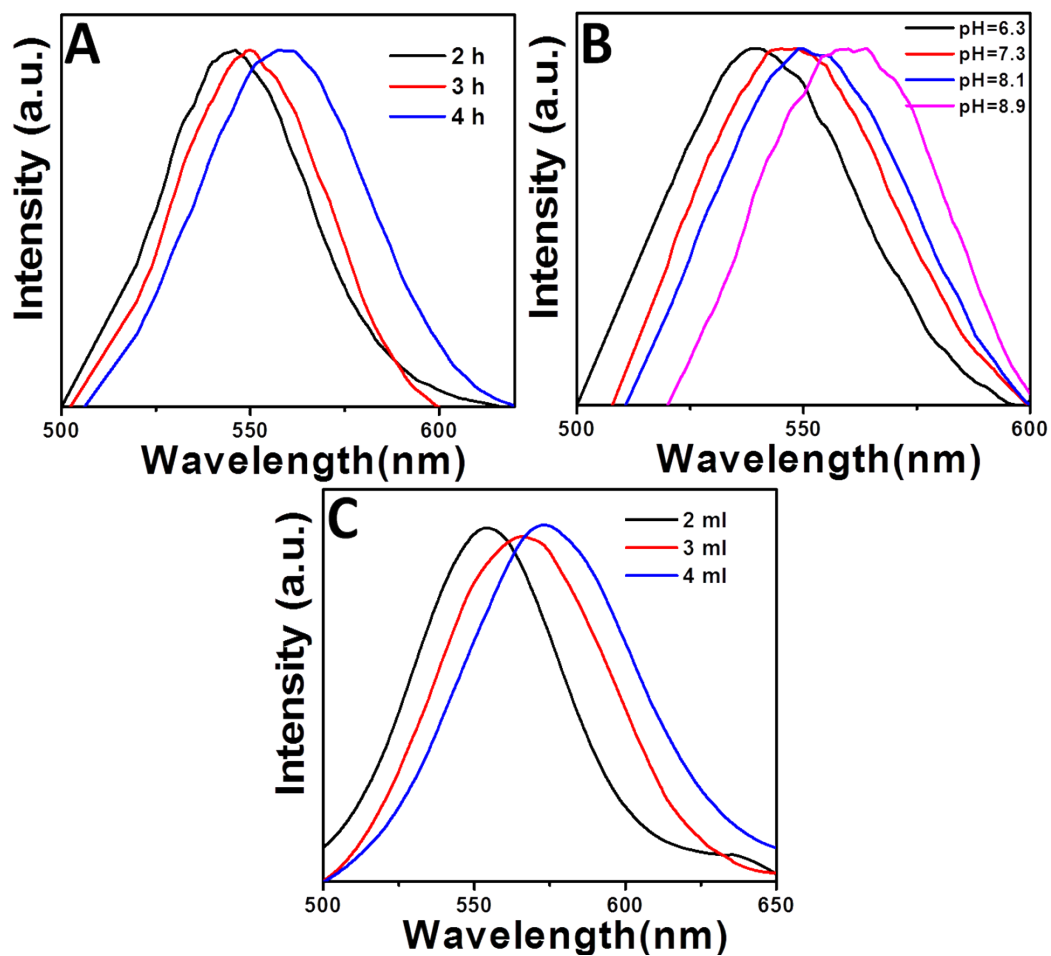

Fig. S4: (A) The hydrothermal time, (B) pH value and (C) the amount of SH-SiO<sub>2</sub> was respectively adjusted under other constant conditions.

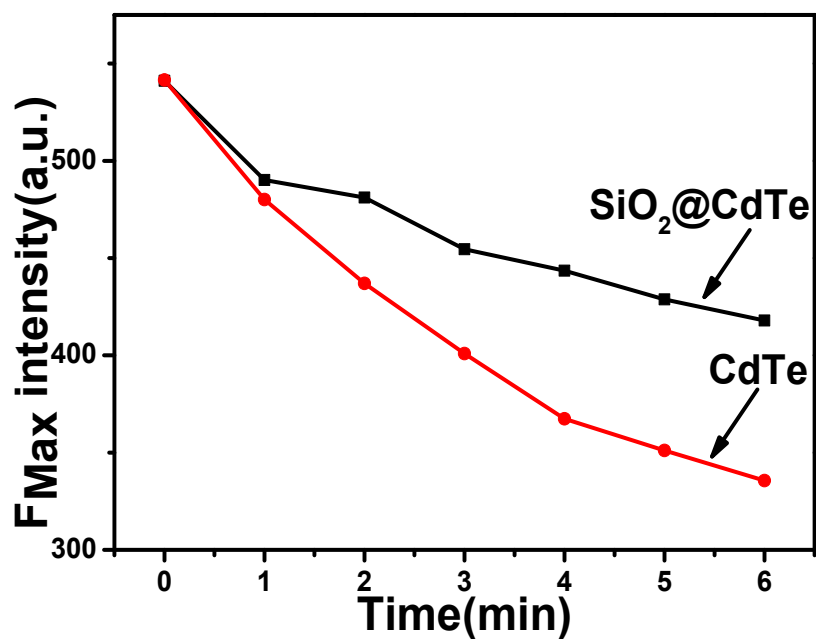

**Fig. S5** The trend of the fluorescent intensity of CdTe QDs and SiO<sub>2</sub>@CdTe NPs response to 0.1 mM H<sub>2</sub>O<sub>2</sub> at the same conditions over time.

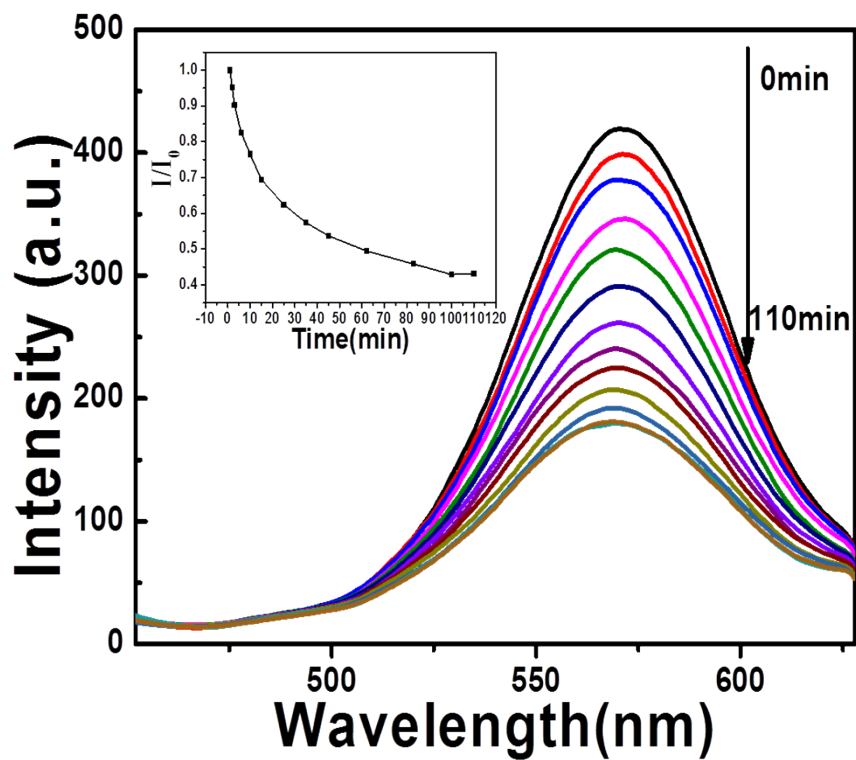

**Fig. S6** The fluorescence spectra of the NPs changed with 0.075 mM H<sub>2</sub>O<sub>2</sub> over time.

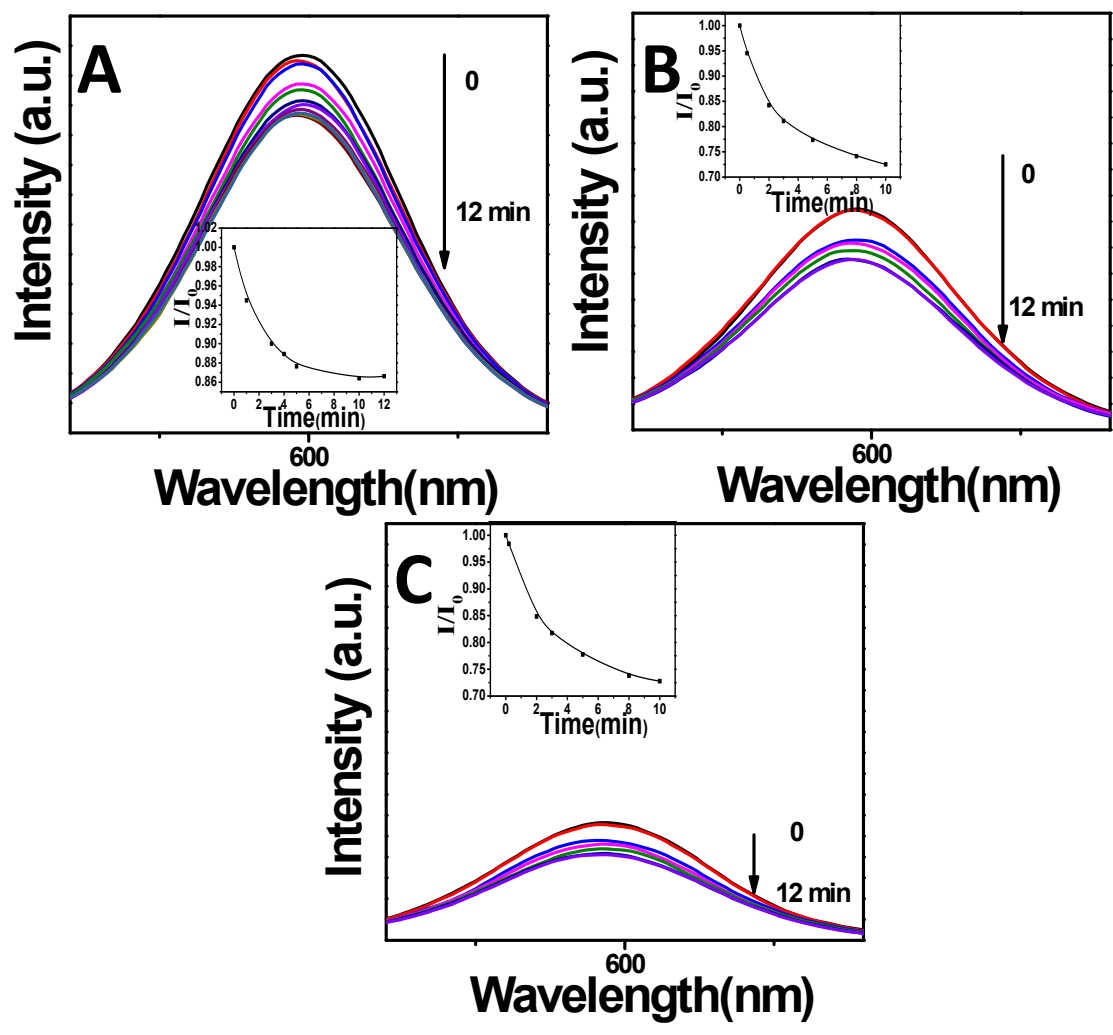

**Fig. S7** The SiO<sub>2</sub>@CdTe NPs could be reused to detect H<sub>2</sub>O<sub>2</sub> eight-times. Relatively, (A) the fluorescent spectra were the first time to detect H<sub>2</sub>O<sub>2</sub> (0.0125 mM); (B) the fifth to detect H<sub>2</sub>O<sub>2</sub> (0.015 mM); (C) the eighth to detect H<sub>2</sub>O<sub>2</sub> (0.02 mM).
